# Supplementary material for: Ultrasound-assisted diversion of nitrobenzene derivatives to their aniline equivalents through a heterogeneous magnetic Ag/Fe3O4-IT nanocomposite catalyst
Source: Royal Society of Chemistry journal article supplement (doi:10.1039/d0nj05147k), 2020-01-01
Supplement: d0nj05147k1.pdf [file d0nj05147k1.pdf]

## Supplementary Information

---

### Ultrasound-Assisted Diversion of Nitrobenzene Derivatives to their Aniline Equivalents through Heterogeneous Magnetic Ag/Fe<sub>3</sub>O<sub>4</sub>-IT Nanocomposite Catalyst

Reza Taheri-Ledari<sup>1</sup>, Jamal Rahimi<sup>1</sup>, Ali Maleki<sup>1,\*</sup> and Ahmed Esmail Shalan<sup>2,3,\*</sup>

<sup>1</sup> Catalysts and Organic Synthesis Research Laboratory, Department of Chemistry, Iran University of  
Science and Technology (IUST), Tehran 16846-13114, Iran.

<sup>2</sup> Central Metallurgical Research and Development Institute (CMRDI), P.O. Box 87, Helwan, Cairo  
11421, Egypt.

<sup>3</sup> BCMaterials, Basque Center for Materials, Applications and Nanostructures, Martina Casiano,  
UPV/EHU Science Park, Barrio Sarriena s/n, Leioa 48940, Spain.

\*Corresponding authors. (A. M) Tel.: +98 21 77240640-50; fax: +98 21 73021584. E-mail address:  
[maleki@iust.ac.ir](mailto:maleki@iust.ac.ir); (A. E. S.) E-mail: [a.shalan133@gmail.com](mailto:a.shalan133@gmail.com)

 Author's ORCIDs:

Reza Taheri-Ledari: <https://orcid.org/0000-0002-6511-9411>

Ali Maleki: <https://orcid.org/0000-0001-5490-3350>

Ahmed Esmail Shalan: <https://orcid.org/0000-0002-3424-1609>

---

| <b>Content</b>                                                                                                                                   | <b>Page</b> |
|--------------------------------------------------------------------------------------------------------------------------------------------------|-------------|
| <b>Table S1.</b> Applied materials and equipment in this project                                                                                 | <b>S3</b>   |
| <b>Figure S1.</b> VSM curves of IT-functionalized Ag/Fe <sub>3</sub> O <sub>4</sub> nanocatalyst and the neat Fe <sub>3</sub> O <sub>4</sub> NPs | <b>S4</b>   |
| <b>Figure S2.</b> FT-IR spectrum of recovered IT-functionalized Ag/Fe <sub>3</sub> O <sub>4</sub> nanocatalyst                                   | <b>S5</b>   |
| <b>Figure S3.</b> EDX spectrum of recovered IT-functionalized Ag/Fe <sub>3</sub> O <sub>4</sub> nanocatalyst                                     | <b>S6</b>   |
| <b>Figure S4.</b> SEM image of recovered IT-functionalized Ag/Fe <sub>3</sub> O <sub>4</sub> nanocatalyst                                        | <b>S7</b>   |
| <b>Figure S5.</b> Spectral data and <sup>1</sup> H-NMR spectrum of benzene-1,4-diamine                                                           | <b>S8</b>   |
| <b>Figure S6.</b> <sup>13</sup> C-NMR spectrum of benzene-1,4-diamine                                                                            | <b>S9</b>   |
| <b>Figure S7.</b> Spectral data and <sup>1</sup> H-NMR spectrum of benzene-1,3-diamine                                                           | <b>S10</b>  |
| <b>Figure S8.</b> <sup>13</sup> C-NMR spectrum of benzene-1,3-diamine                                                                            | <b>S11</b>  |
| <b>Figure S9.</b> Spectral data and <sup>1</sup> H-NMR spectrum of 4-aminophenol                                                                 | <b>S12</b>  |
| <b>Figure S10.</b> <sup>13</sup> C-NMR spectrum of 4-aminophenol                                                                                 | <b>S13</b>  |
| <b>Figure S11.</b> Spectral data and <sup>1</sup> H-NMR spectrum of 3,4-diaminobenzoic acid                                                      | <b>S14</b>  |
| <b>Figure S12.</b> <sup>13</sup> C-NMR spectrum of 3,4-diaminobenzoic acid                                                                       | <b>S15</b>  |

**Table S1.** Applied materials and equipment in this project.

| Material / equipment                   | Brand                                           |
|----------------------------------------|-------------------------------------------------|
| Silver nitrate                         | Sigma Aldrich, $\geq 99.0\%$                    |
| Iron(II) chloride tetrahydrate         | Sigma Aldrich, $\geq 99\%$                      |
| Iron(II) chloride hexahydrate          | Sigma Aldrich, $\geq 99\%$                      |
| 5-Chloro-2-methyl-4-isothiazolin-3-one | Santa Cruz Biotechnology                        |
| Ammonia                                | Merck, 25%                                      |
| APTES                                  | Sigma Aldrich, 99%                              |
| Solvents                               | Merck                                           |
| Nitrobenzene derivatives               | Sigma Aldrich                                   |
| Potassium carbonate                    | Sigma Aldrich, $\geq 99\%$                      |
| Silica gel for Column chromatography   | Sigma Aldrich, 60                               |
| Glass tube                             | 13 by 100 mm, equipped with a threaded cap      |
| Glassware                              | Iso-Lab                                         |
| Ultrasound bath                        | Cleaning bath KQ-250 DE                         |
| SEM analysis                           | ZEISS SIGMA                                     |
| TEM analysis                           | Philips CM200                                   |
| HRTEM                                  | Hitachi S-5200 and Philips CM200                |
| XRD                                    | X-ray diffractometer operating at 40 mA, 40 kV, |
| DLS analysis                           | Horiba (SZ-100)                                 |
| FT-IR analysis                         | Shimadzu-8400s                                  |
| EDX analysis                           | VEGA-TESCAN-XMU                                 |
| XPS analysis                           | K-Alpha                                         |
| VSM analysis                           | Meghnatis Kavir Kashan Co.                      |
| NMR analysis                           | Varian Unity Inova 500 MHz                      |
| Melting point apparatus                | Electrothermal 9100                             |
| TLC plate (silica)                     | Merck silica gel GF254 plates                   |

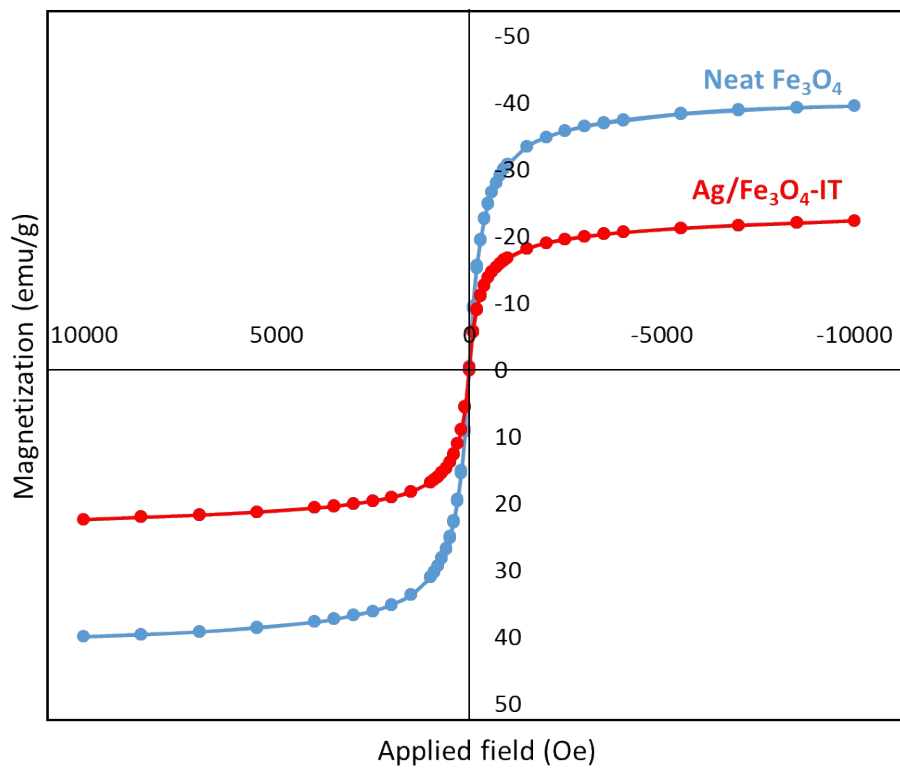

**Figure S1.** VSM M-H curves of IT-functionalized Ag/Fe<sub>3</sub>O<sub>4</sub> nanocatalyst and the neat Fe<sub>3</sub>O<sub>4</sub> NPs (recorded at room temperature).

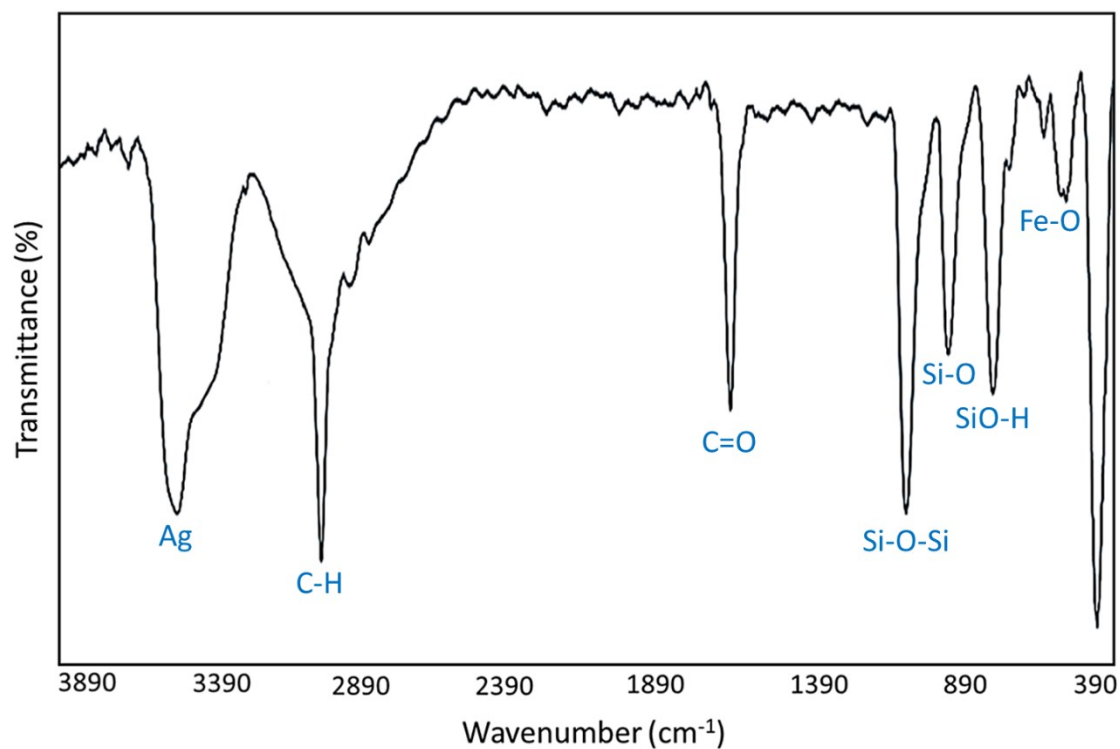

**Figure S2.** FT-IR spectrum of recovered IT-functionalized Ag/Fe<sub>3</sub>O<sub>4</sub> nanocatalyst.

A sharp peak at 3500 cm<sup>-1</sup> is related to Ag NPs, a sharp peak at 2950 cm<sup>-1</sup> is related to C–H (sp<sup>3</sup>), a sharp peak at 1690 cm<sup>-1</sup> is related to C=O (present in the IT ring), a sharp peak at 1100 cm<sup>-1</sup> is related to Si–O–Si (stretching vibration), a peak at 1000 cm<sup>-1</sup> is related to Si–O (stretching vibration), a peak around 860 cm<sup>-1</sup> is related to SiO–H (stretching vibration), and the peak appeared at around 580 cm<sup>-1</sup> coming from Fe–O bond.

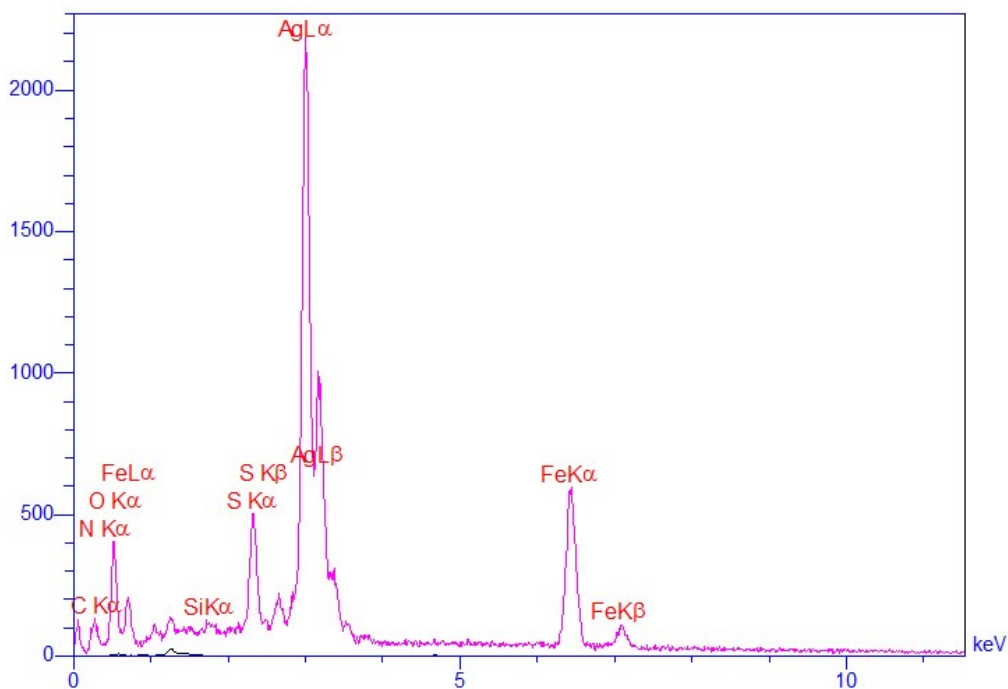

**Figure S3.** EDX spectrum of recovered IT-functionalized Ag/Fe<sub>3</sub>O<sub>4</sub> nanocatalyst.

C: 10.6 wt%

N: 5.4 wt%

O: 20.3 wt%

Si: 0.3 wt%

S: 3.5 wt%

Fe: 14.4 wt%

Ag: 45.5 wt%

Per 100 g of catalyst, there are 0.26 mol Fe and 0.42 mol of Ag elements. It means that the molar ratio of Fe/Ag in 100 g of catalyst is: **0.61**

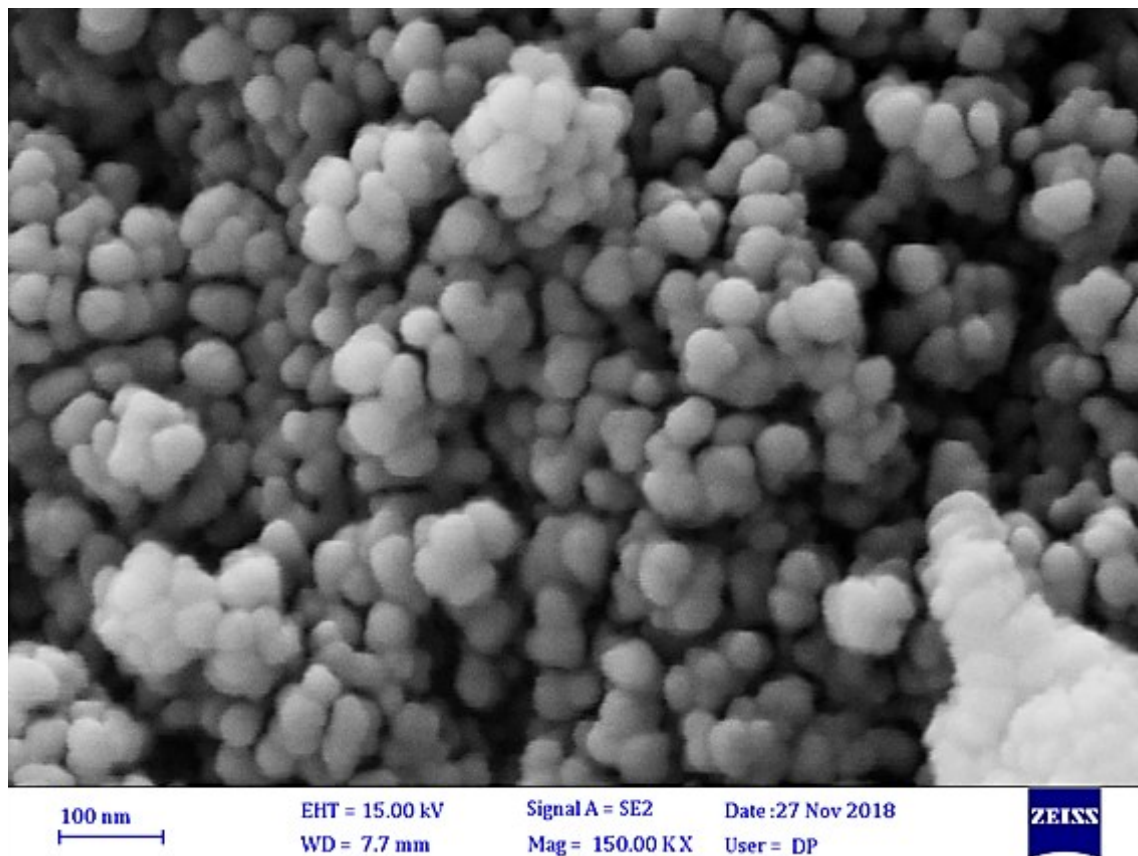

**Figure S4.** SEM image of recovered IT-functionalized Ag/Fe<sub>3</sub>O<sub>4</sub> nanocatalyst.

*Benzene-1,4-diamine* (Table 2 – Entry 2):  $^1\text{H}$  NMR (500 MHz,  $\text{CDCl}_3$ )  $\delta$  6.59 (s, 4 H), 3.36 (s, 4 H).  $^{13}\text{C}$  NMR (500 MHz,  $\text{CDCl}_3$ )  $\delta$  138.75, 116.87.

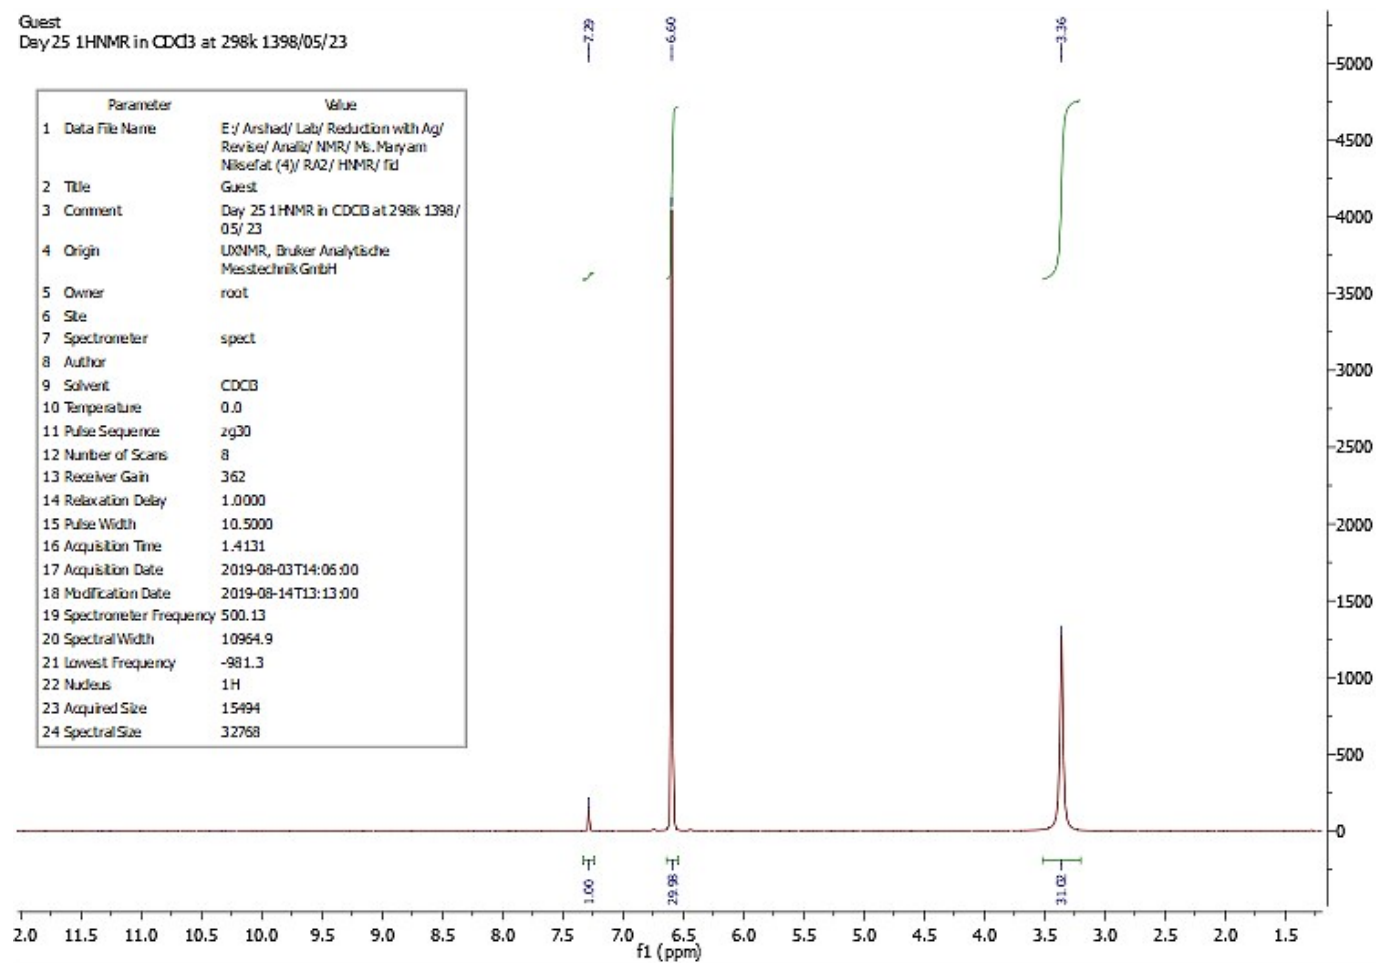

Figure S5. Spectral data and  $^1\text{H}$ -NMR spectrum of benzene-1,4-diamine.



Guest  
Day25 13CNMR in CDCl3 at 298k 1398/05/23

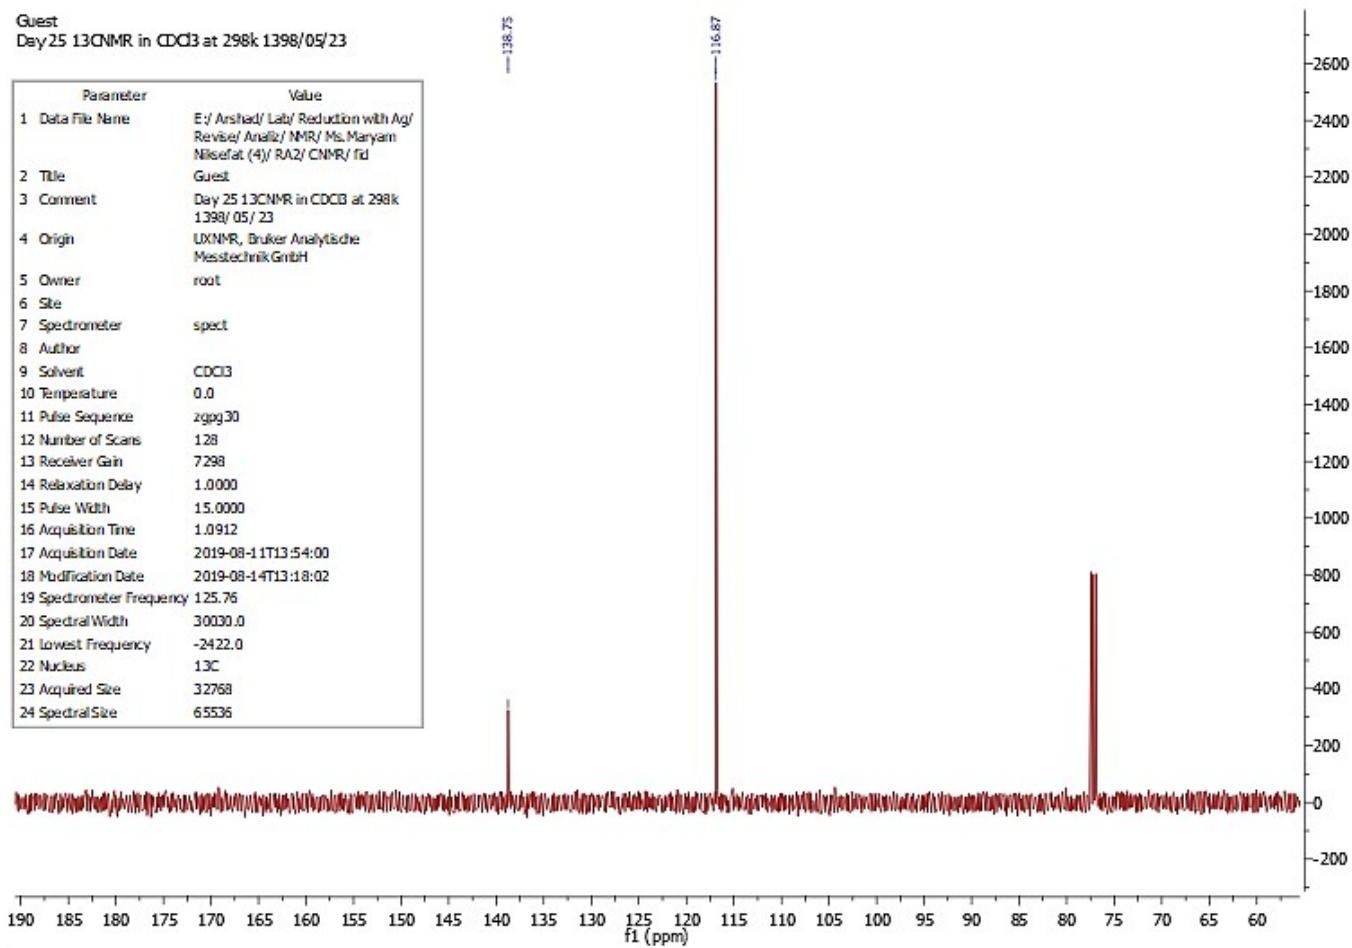

**Figure S6.**  $^{13}\text{C}$ -NMR spectrum of benzene-1,4-diamine.

*Benzene-1,3-diamine* (**Table 2 – Entry 3**):  $^1\text{H}$  NMR (500 MHz,  $\text{CDCl}_3$ )  $\delta$  6.96-6.99 (m, 1 H), 6.15–6.13 (d,  $J = 7.8$  Hz, 2 H), 6.03 (s, 1 H), 3.59 (s, 4 H).  $^{13}\text{C}$  NMR (500 MHz,  $\text{CDCl}_3$ )  $\delta$  147.78, 130.34, 106.25, 102.18.

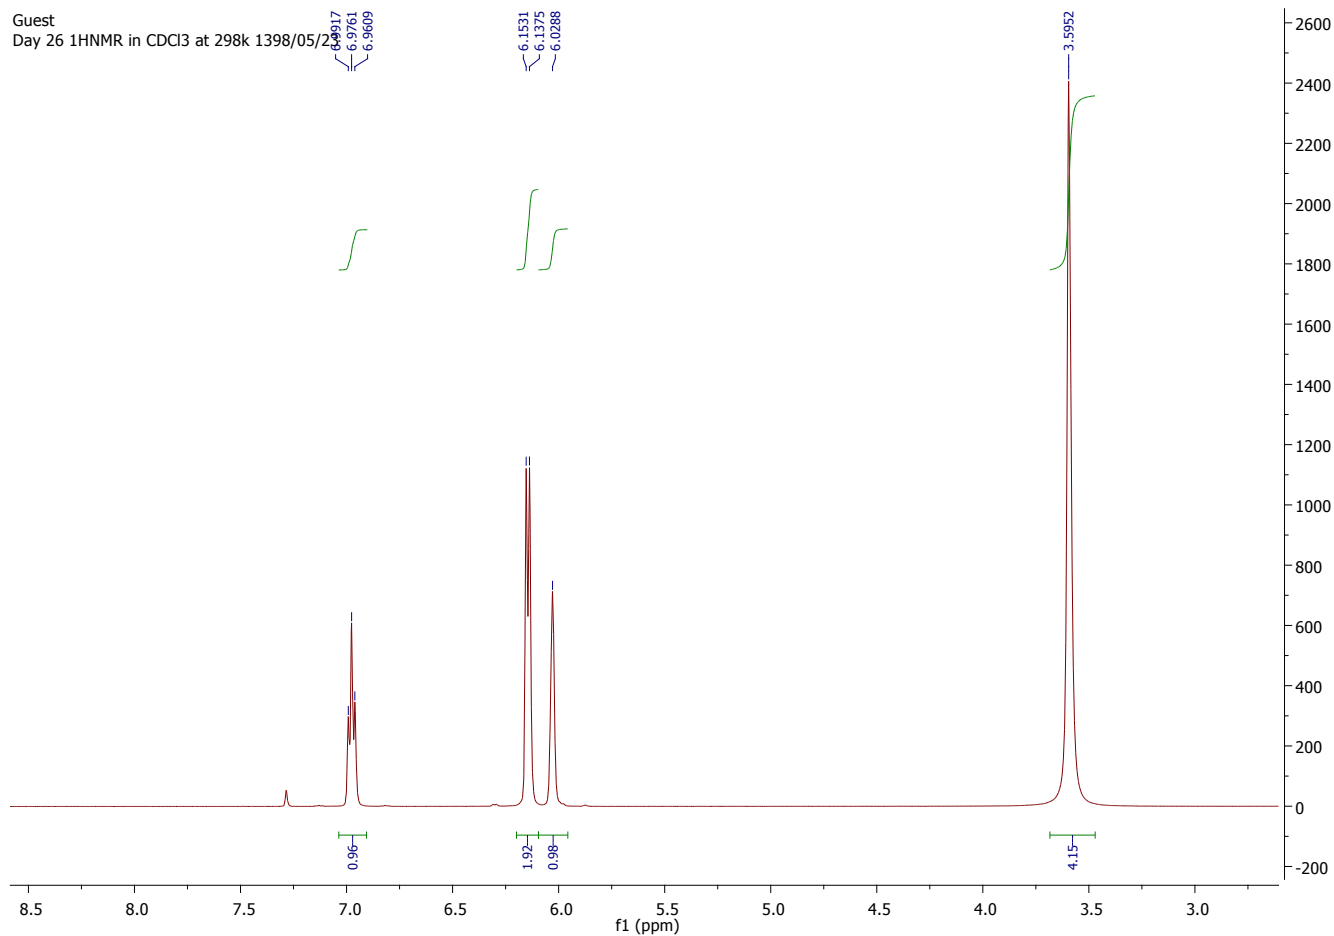

**Figure S7.** Spectral data and  $^1\text{H}$ -NMR spectrum of benzene-1,3-diamine.

Guest  
Day 26  $^{13}\text{C}$ NMR in  $\text{CDCl}_3$  at 298k 1398/05/23

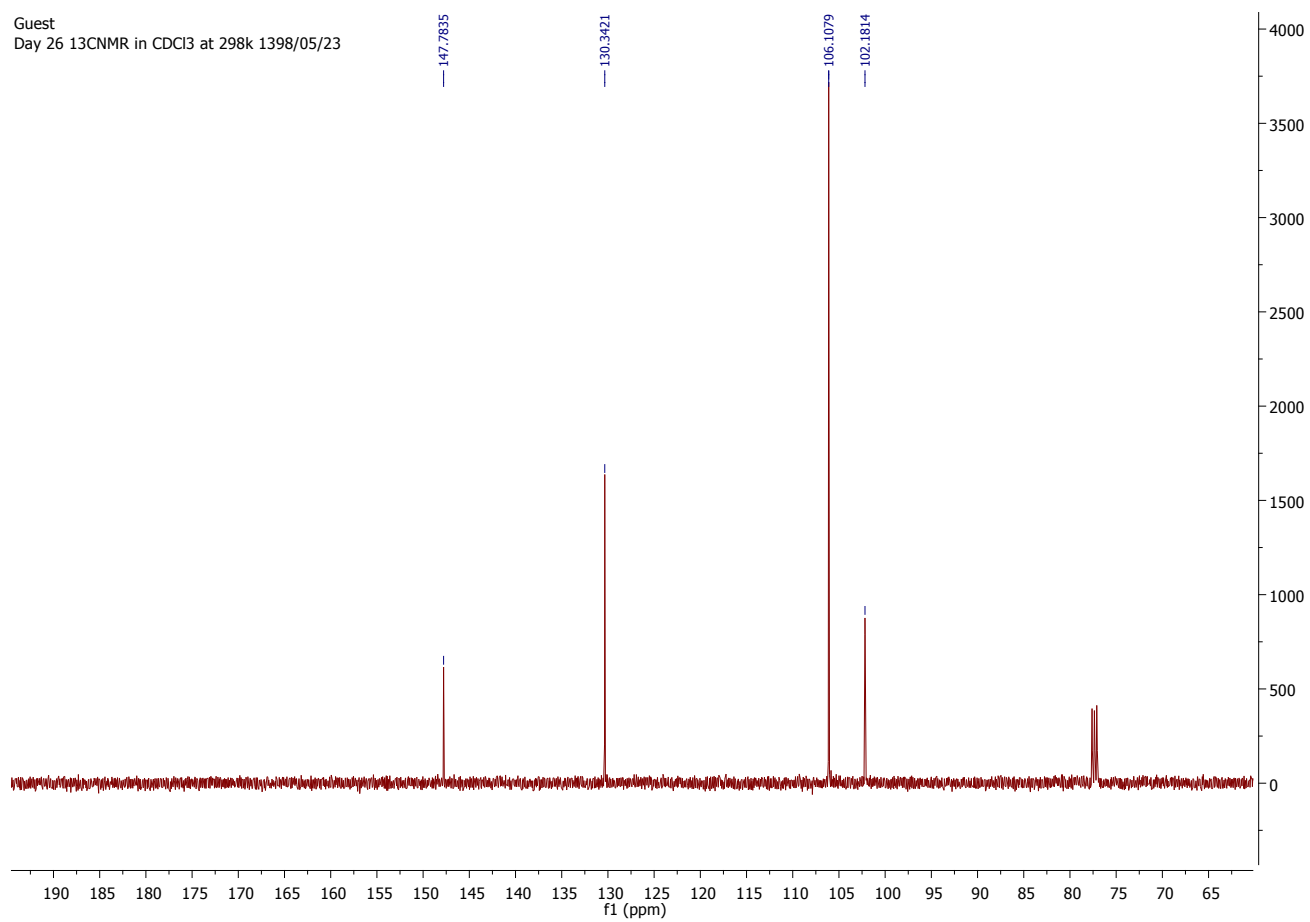

**Figure S8.**  $^{13}\text{C}$ -NMR spectrum of benzene-1,3-diamine.

*4-Aminophenol* (**Table 3, Entry 6**): white solid,  $^1\text{H}$  NMR (500 MHz, DMSO):  $\delta$  (ppm) = 4.38 (2H, s,  $\text{NH}_2$ ), 6.42–6.44 (2H, d,  $J=10$  Hz, H–Ar), 6.48–6.50 (2H, d,  $J=10$  Hz, H–Ar), 8.37 (1H, s, OH).  $^{13}\text{C}$  NMR (500 MHz, DMSO)  $\delta$  168.09, 153.70, 131.82, 113.18.

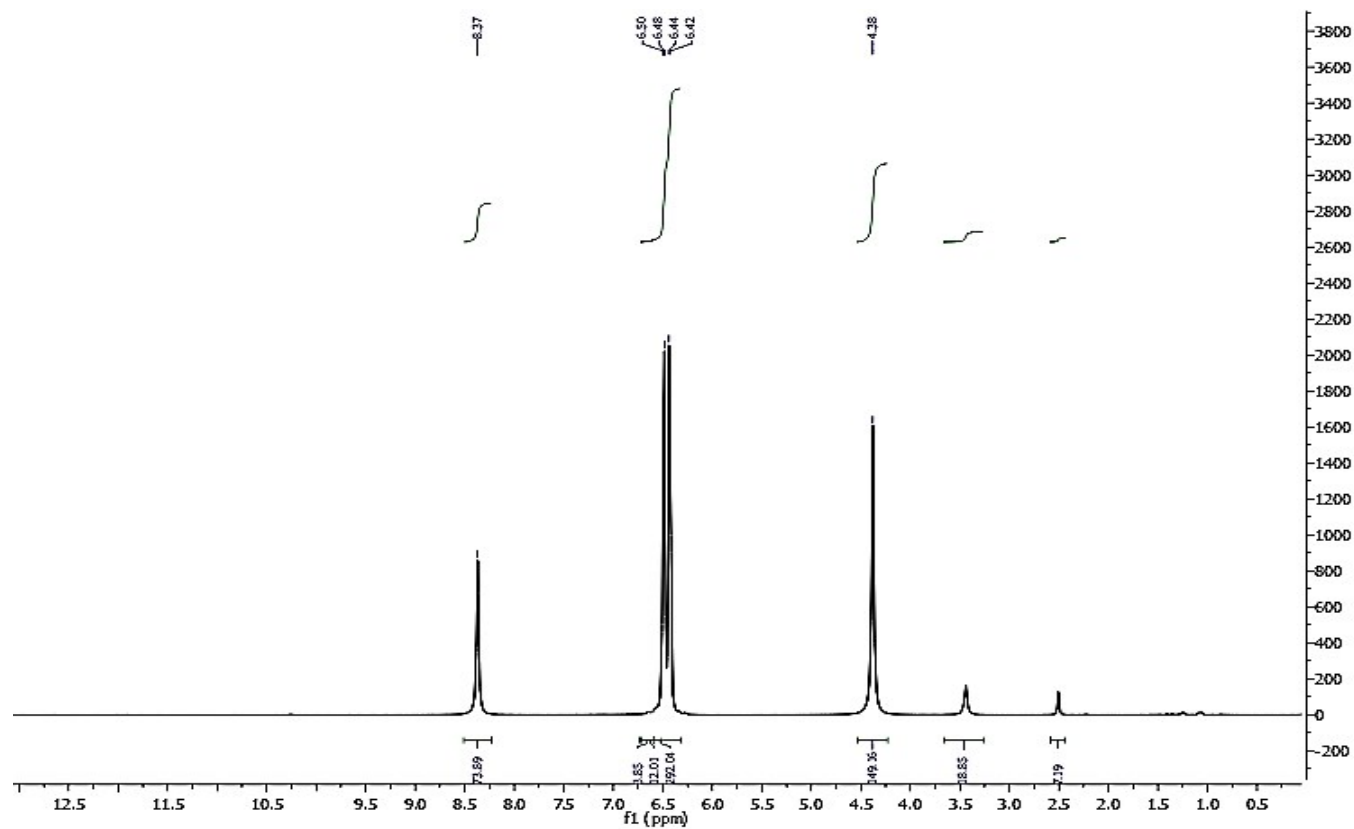

**Figure S9.** Spectral data and  $^1\text{H}$ -NMR spectrum of 4-aminophenol.

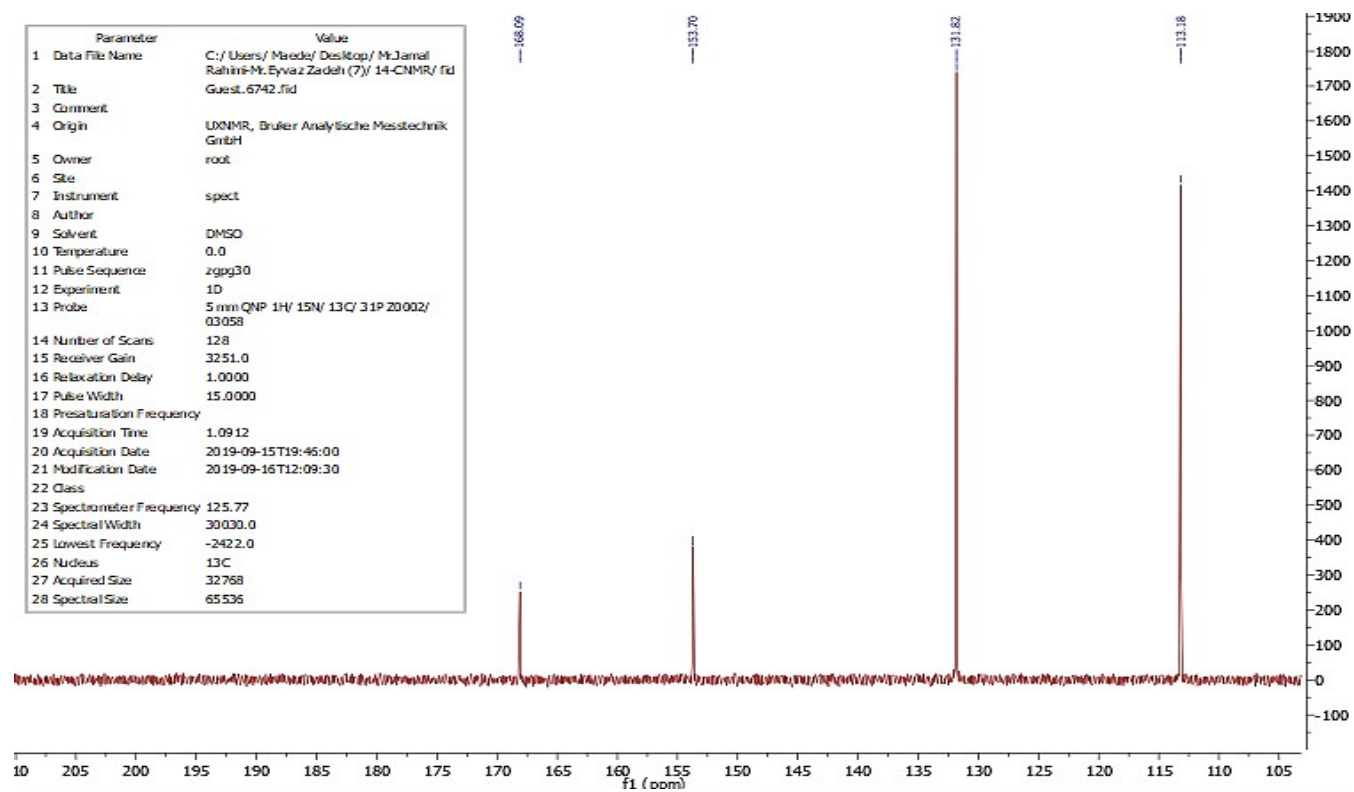

**Figure S10.** <sup>13</sup>C-NMR spectrum of 4-aminophenol.

**3,4-Diaminobenzoic acid (Table 2 – Entry 9):**  $^1\text{H}$  NMR (500 MHz, DMSO)  $\delta$  5.37 (s, 4H), 6.51-6.53 (d, J = 10 Hz, 1H), 7.10-7.12 (d, J = 10 Hz, 1H), 7.17 (s, 1H).  $^{13}\text{C}$  NMR (500 MHz, DMSO)  $\delta$  168.63, 140.76, 134.24, 121.09, 118.99, 116.04, 113.36.

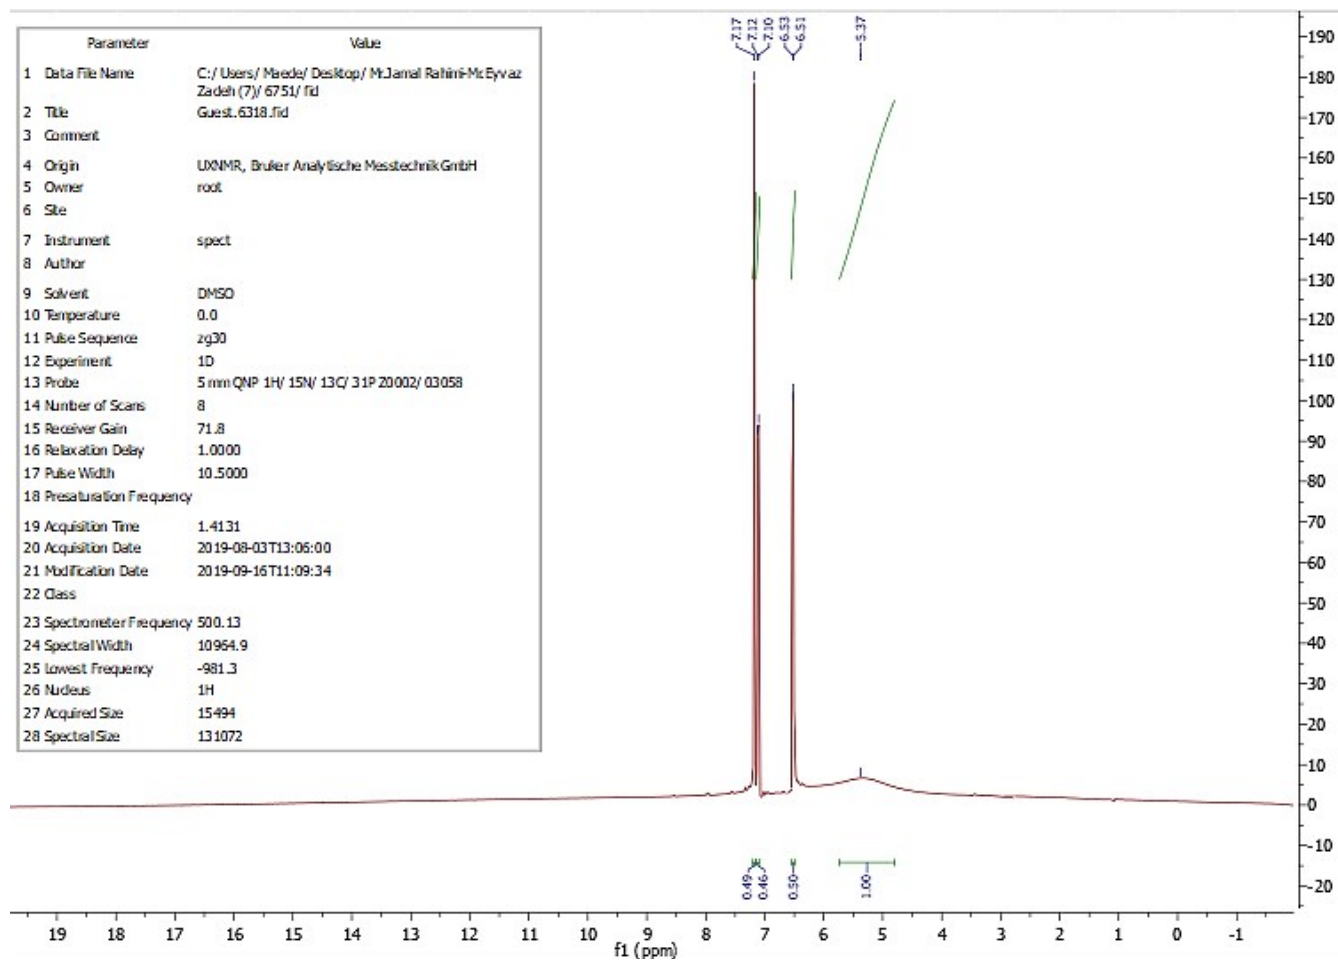

**Figure S11.** Spectral data and  $^1\text{H}$ -NMR spectrum of 3,4-diaminobenzoic acid.

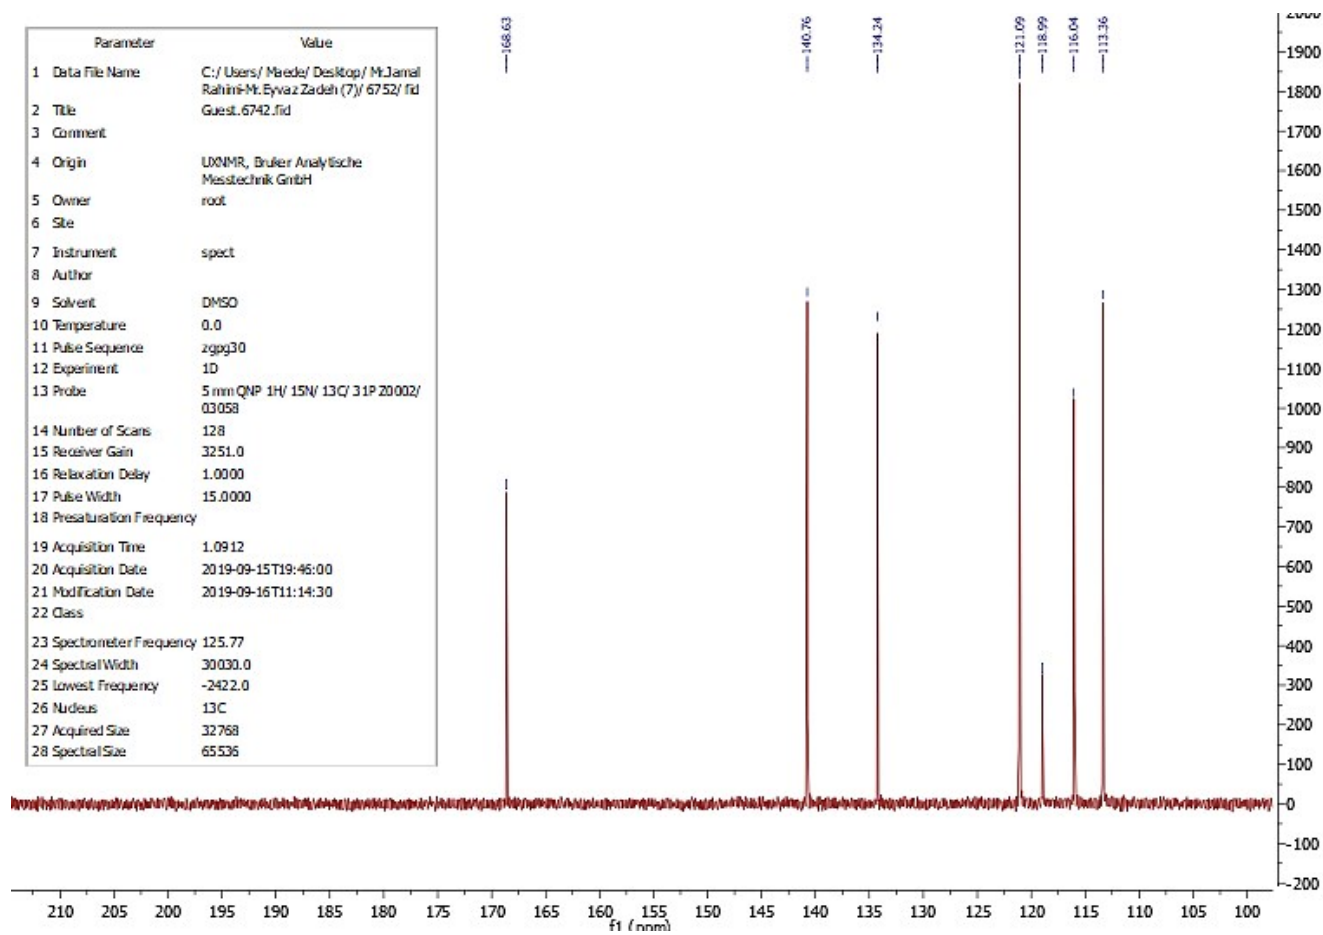

**Figure S12.**  $^{13}\text{C}$ -NMR spectrum of 3,4-diaminobenzoic acid.
